# Supplementary material for: Polyelectrolyte Multilayer Films Modification with Ag and rGO Influences Platelets Activation and Aggregate Formation under In Vitro Blood Flow
Source: MDPI journal article supplement (doi:10.3390/nano10050859), 2020-04-29
Supplement: s1 [file s1]

# Supplementary Materials: Polyelectrolyte Multilayer Films Modification with Ag and rGO Influences Platelets Activation and Aggregate Formation under In Vitro Blood Flow

Gabriela Imbir, Aldona Mzyk, Klaudia Trembecka-Wójciga, Ewa Jasek-Gajda,  
Hanna Plutecka, Romana Schirhagl and Roman Major

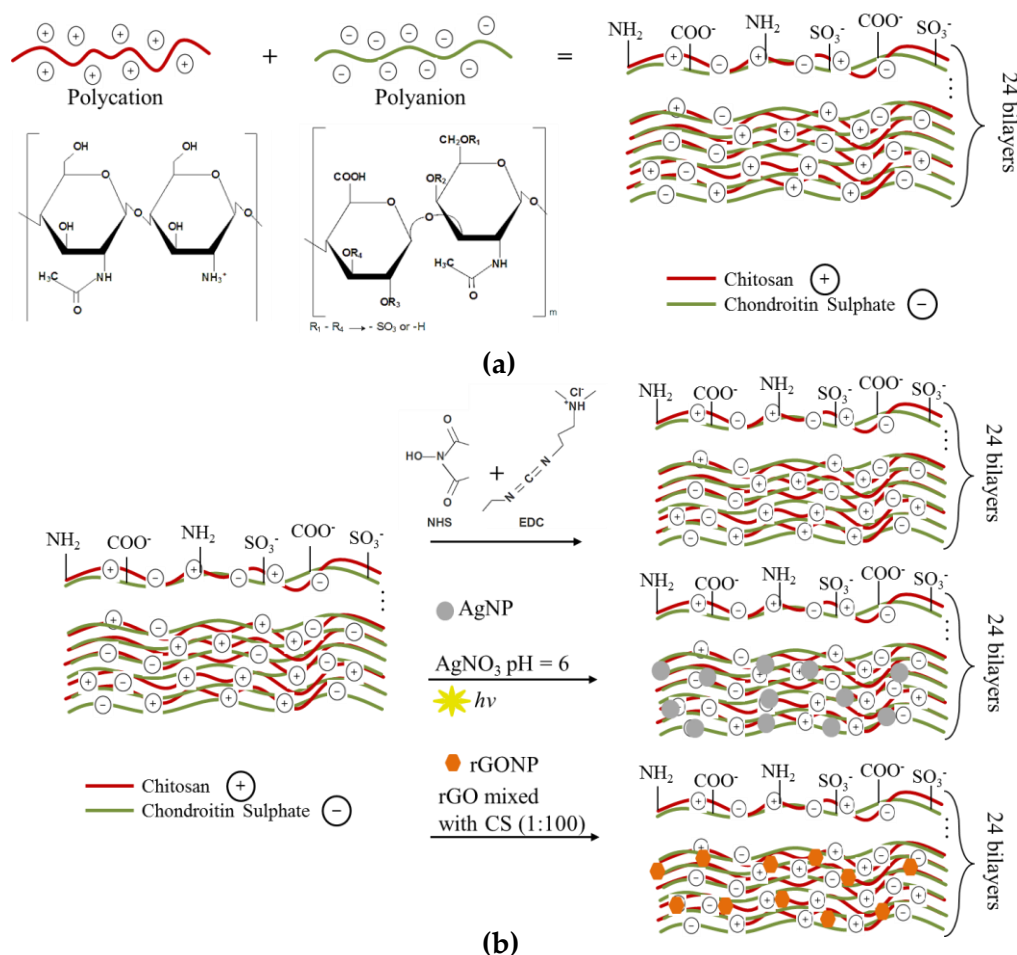

**Figure S1.** Layer-by-layer deposition of the chitosan/chondroitin sulfate (Chi/CS) polyelectrolyte multilayer film: (a) unmodified PEMs, (b) PEMs modification by cross-linking with NHS/EDC, *in situ* synthesis of silver nanoparticles and incorporation of reduced graphene oxide flakes.
